# Supplementary material for: Emergence of Carbapenem Resistance Due to the Novel Insertion Sequence ISPa8 in Pseudomonas aeruginosa
Source: PubMed Central journal article supplement (PMC3948848; doi:10.1371/journal.pone.0091299), 2014-03-10
Supplement: pone.0091299.s001.pdf [file pone.0091299.s001.pdf]

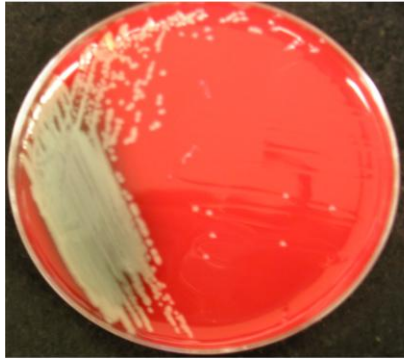

PAO1

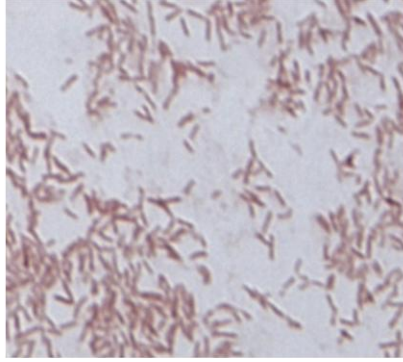

(40X)

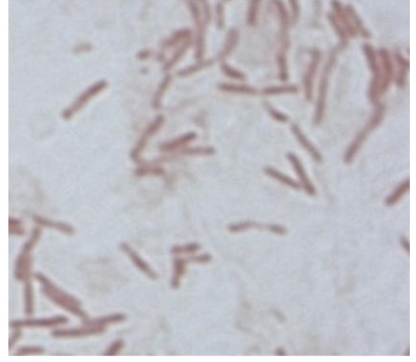

(100X)

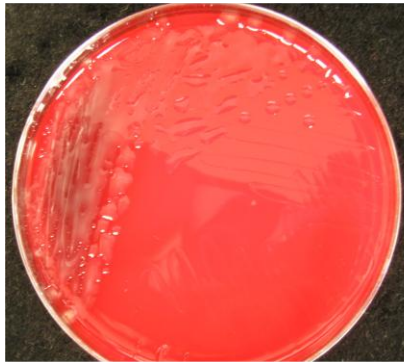

PA42

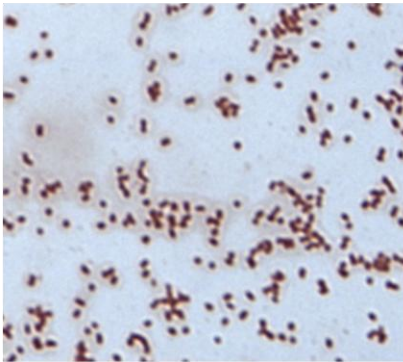

(40X)

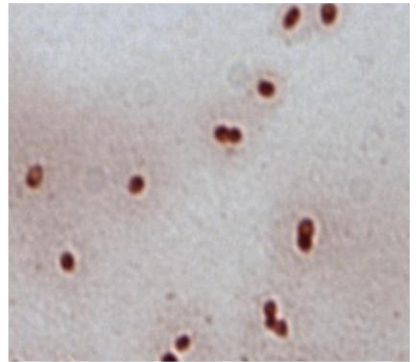

(100X)
