# Supplementary material for: Emergence of Carbapenem Resistance Due to the Novel Insertion Sequence ISPa8 in Pseudomonas aeruginosa
Source: PubMed Central journal article supplement (PMC3948848; doi:10.1371/journal.pone.0091299), 2014-03-10

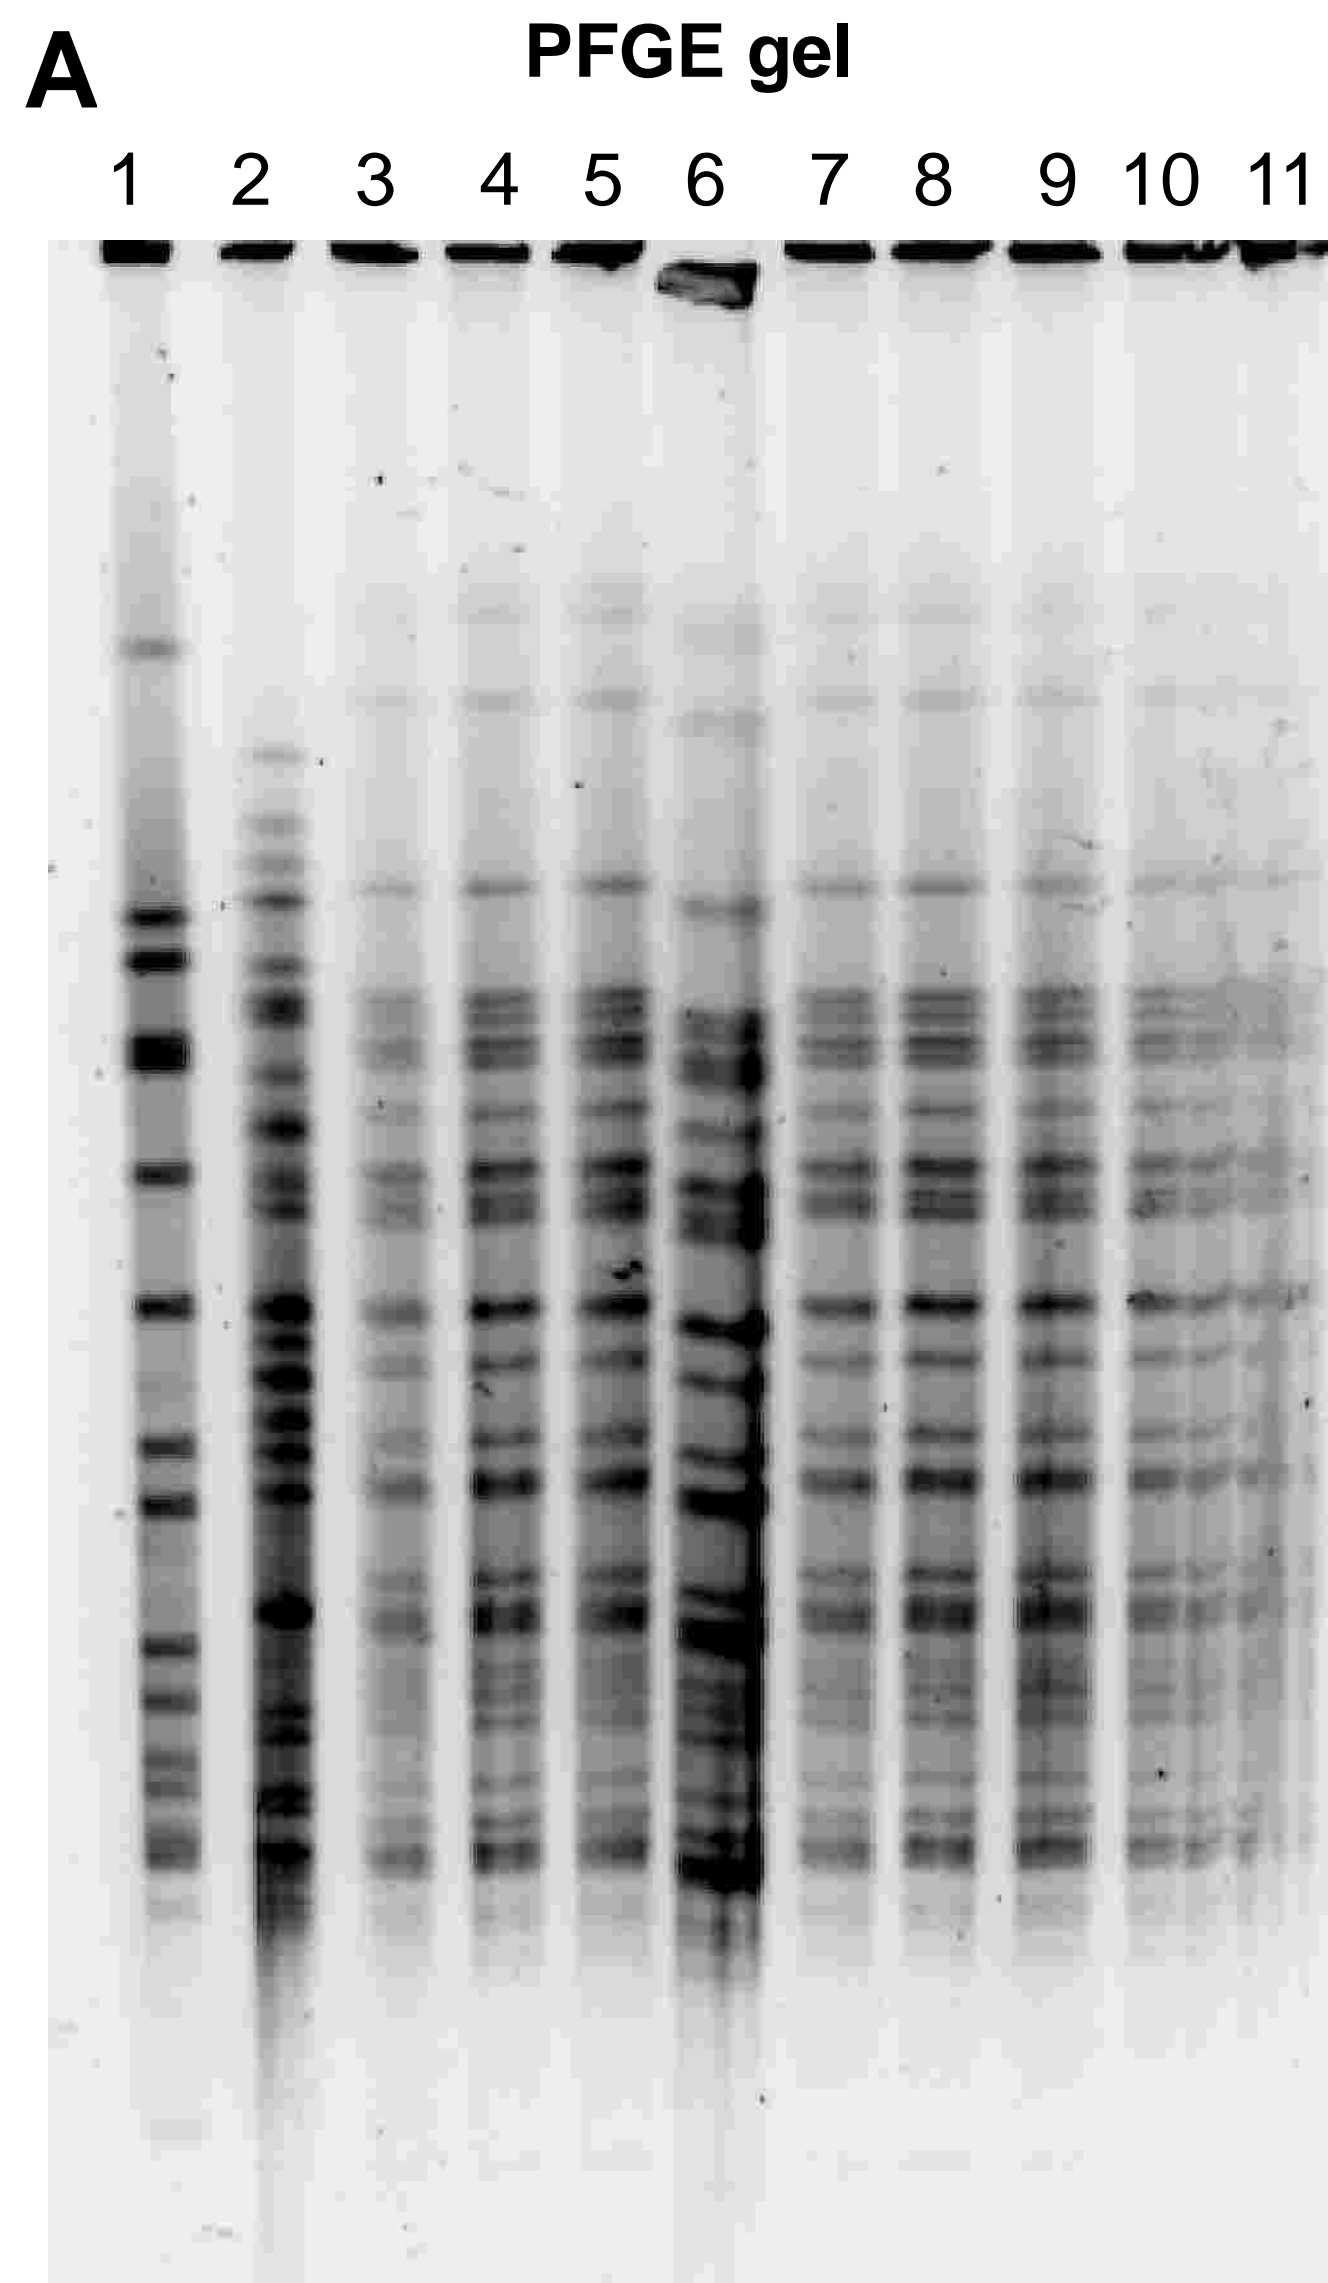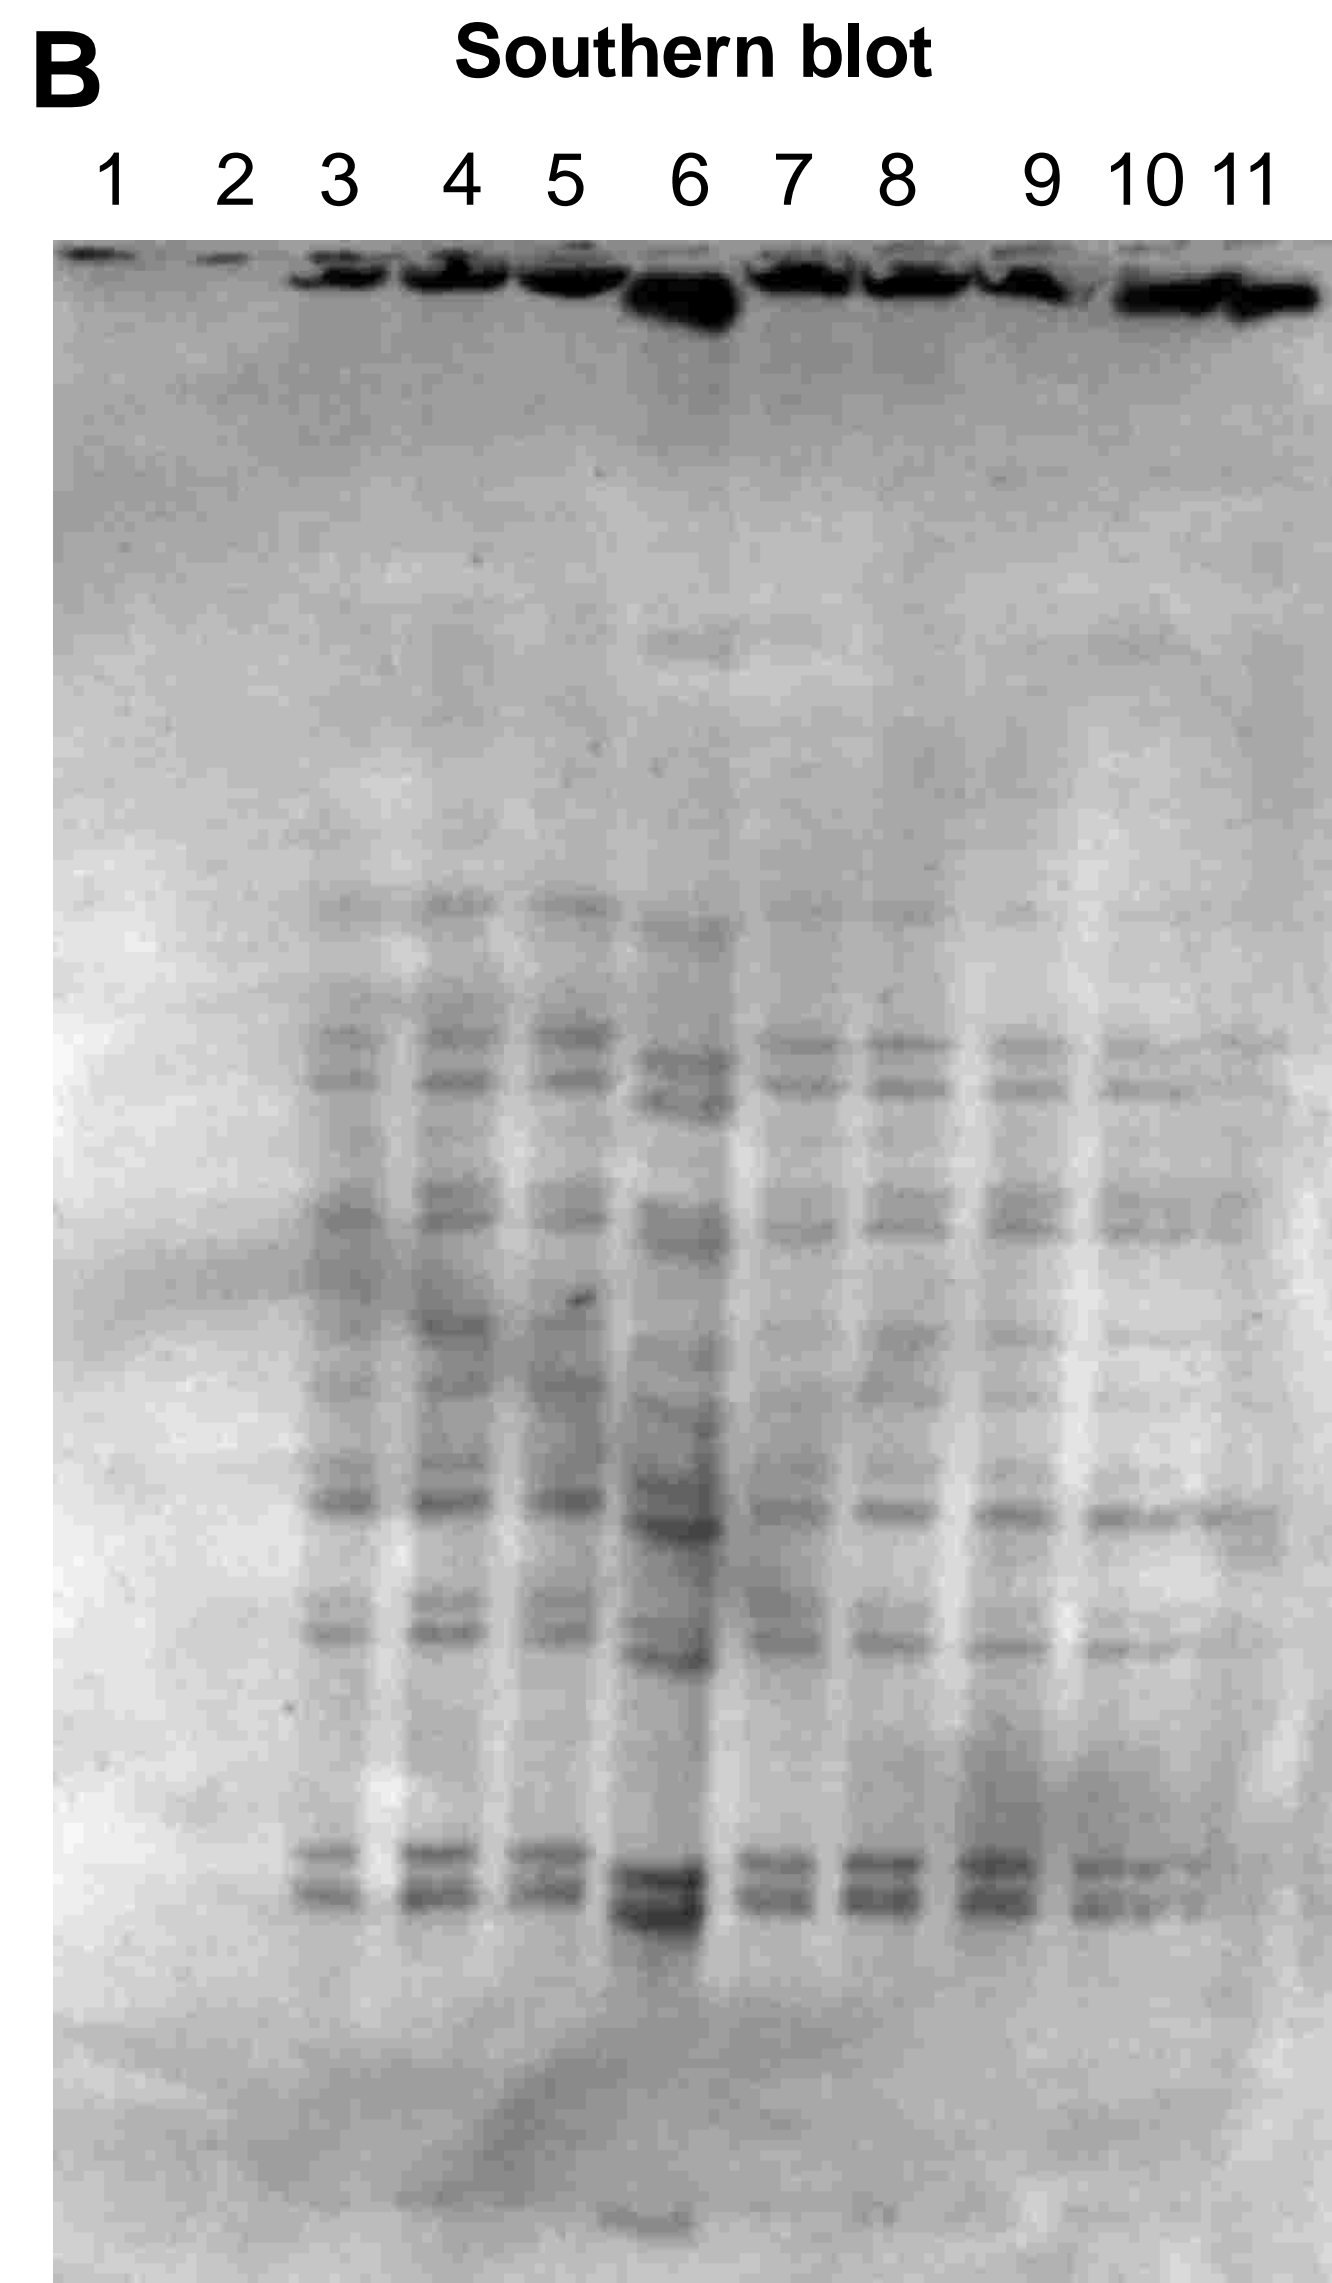

Supplement: pone.0091299.s002.pdf [file pone.0091299.s002.pdf]
